# Supplementary material for: Enhanced CO2 electroreduction efficiency through secondary coordination effects on a pincer iridium catalyst
Source: Royal Society of Chemistry journal article supplement (doi:10.1039/c5cc00458f), 2015-01-01
Supplement: c5cc00458f1.pdf [file c5cc00458f1.pdf]

## **ESI: Enhanced CO<sub>2</sub> Electroreduction Efficiency through Secondary Coordination Effects on a Pincer Iridium Catalyst**

Steven T. Ahn,<sup>a</sup> Elizabeth A. Bielinski,<sup>b</sup> Elizabeth M. Lane,<sup>c</sup> Yanqiao Chen,<sup>a</sup> Wesley H. Bernskoetter,<sup>\*,c</sup> Nilay Hazari<sup>\*b</sup> and G. Tayhas R. Palmore<sup>\*a</sup>

<sup>a</sup>*School of Engineering, Brown University, Providence, RI 02912*

<sup>b</sup>*Department of Chemistry, Yale University, New Haven, CT 06520*

<sup>c</sup>*Department of Chemistry, Brown University, Providence, RI 02912*

*-Electronic Supplementary Information -*

## **Table of Contents**

|                                        |     |
|----------------------------------------|-----|
| Experimental Details                   | S2  |
| Selected Spectra from Product Analysis | S6  |
| Selected Electrochemical Data          | S8  |
| NMR Spectra for Complex <b>3</b>       | S10 |
| References                             | S11 |

## Experimental Details

**General Considerations.** Nitrogen (N<sub>2</sub>, 99.999%, Corp Brothers) and carbon dioxide (CO<sub>2</sub>, 99.995%, laser grade, Praxair) with less than 2 ppm H<sub>2</sub>O were used as received. Acetonitrile was dried and deoxygenated using literature procedures,<sup>1</sup> tested *via* Karl Fischer titration for trace amounts of water, and stored over 4Å molecular sieves until use. 18.2 MΩ deionized water was provided by a Milli-Q water purification system and was sparged with and stored under N<sub>2</sub>. Tetrabutylammonium hexafluorophosphate (<sup>n</sup>Bu<sub>4</sub>NPF<sub>6</sub>, electrochemical grade, Sigma-Aldrich) was dried at 60 °C under vacuum for 24 hr and stored in a glovebox. Compounds **1**,<sup>2</sup> **2**,<sup>3</sup> and H[B(Ar<sup>F</sup>)<sub>4</sub>](Et<sub>2</sub>O)<sub>2</sub><sup>4</sup> (B(Ar<sup>F</sup>)<sub>4</sub> = tetrakis[3,5-bis(trifluoromethyl)phenyl]borate) were prepared as previously described. All other reagents were purchased from Aldrich, Acros, Alpha Aesar or Strem chemicals and used as received. Manipulations of air-sensitive materials were conducted using standard vacuum, Schlenk, or glovebox techniques. <sup>1</sup>H and <sup>31</sup>P NMR spectra were recorded on Bruker Avance DRX-400 (400 MHz) and Avance 600 (600 MHz) spectrometers. <sup>1</sup>H chemical shifts are referenced to residual solvent signals, and <sup>31</sup>P chemical shifts are referenced to a H<sub>3</sub>PO<sub>4</sub> external standard. Gaseous products were analyzed on a Buck Scientific 910 gas chromatograph (GC) in the Multiple Gas #3 configuration with automated sample loop.

**Observation of [(PN<sup>H</sup>P)IrH<sub>2</sub>(MeCN)]<sup>+</sup> (**3**).** A J. Young NMR tube was charged with (PN<sup>H</sup>P)IrH<sub>3</sub> (**1**) (10 mg, 0.020 mmol) in CD<sub>3</sub>CN and treated with H[B(Ar<sup>F</sup>)<sub>4</sub>](Et<sub>2</sub>O)<sub>2</sub> (26 mg, 0.030 mmol). The formation of **3** was monitored by NMR spectroscopy and complete conversion occurred within 30 min at ambient temperature. <sup>1</sup>H NMR (CD<sub>3</sub>CN):

$\delta$  7.71 (br s, 8H, *o*-Ar), 7.67 (br s, 4H, *p*-Ar), 3.32 (m, 2H, CH<sub>2</sub>), 2.52 (m, 2H, CH<sub>2</sub>), 2.19 (m, 2H, CH), 2.12 (m, 2H, CH<sub>2</sub>), 2.06 (m, 2H, CH), 1.78 (m, 2H, CH<sub>2</sub>), 1.24-1.29 (m, 12H, CH<sub>3</sub>), 1.03 (dd, 6H, CH<sub>3</sub>), 0.96 (dd, 6H, CH<sub>3</sub>), -20.14 (t, 1H, Ir-H, J = 13 Hz), -22.27 (t, 1H, Ir-H, J = 16 Hz) (N-H resonance not located). <sup>13</sup>C{<sup>1</sup>H} NMR taken from HSQC (CD<sub>3</sub>CN):  $\delta$  16.5 (CH<sub>3</sub>), 17.9 (CH<sub>3</sub>), 19.8 (CH<sub>3</sub>), 20.6 (CH<sub>3</sub>), 22.5 (CH), 26.5 (CH), 32.4 (CH<sub>2</sub>), 55.2 (CH<sub>2</sub>), 117.6 (*p*-Ar), 134.5 (*o*-Ar). <sup>31</sup>P{<sup>1</sup>H} NMR (CD<sub>3</sub>CN): 51.37 (s, 2P).

### General Procedures for Electrochemistry Experiments

Cyclic voltammetry and bulk electrolysis experiments were performed on a Pine Research AFCBP1 bipotentiostat. The three-electrode system included either a smaller glassy carbon (GC) working electrode (7.1 mm<sup>2</sup>, BASi) or larger GC electrode (19.6 mm<sup>2</sup>, Bio-Logic) and platinum (Pt) mesh counter electrode (99.9%, Alfa Aesar). The reference electrode was Ag/AgNO<sub>3</sub> (*i.e.*, Ag/Ag<sup>+</sup>) non-aqueous electrode filled with 0.01 M AgNO<sub>3</sub> and 0.1 M <sup>n</sup>Bu<sub>4</sub>NPF<sub>6</sub> in CH<sub>3</sub>CN (-0.08 V vs Fc/Fc<sup>+</sup>, BASi). Prior to each experiment, the GC electrode was polished in succession with a 1- $\mu$ m, 0.3- $\mu$ m, and 0.05- $\mu$ m alumina slurry to obtain a mirror finish, sonicated in 50:50 acetone and Milli-Q water, rinsed in Milli-Q water and dried *in vacuo*. Cyclic voltammograms (CVs) were conducted in a gas-tight one-compartment cell to minimize internal resistance impacting measured potentials. For electrolysis, the counter electrode was separated from the working electrode in a gas-tight two-compartment cell with vigorous stirring in the cathode compartment. Electrolyses of 1 mM **1** were conducted under 1 atm CO<sub>2</sub> in 5-6 mL 12% v/v H<sub>2</sub>O/CH<sub>3</sub>CN (0.1 M <sup>n</sup>Bu<sub>4</sub>NPF<sub>6</sub>, RT, no *iR* compensation). For control experiments, **1** was omitted and/or N<sub>2</sub> replaced CO<sub>2</sub>. Ferrocene was added at the end of

each experiment and the potential was converted relative to the midpoint potential of the Fc/Fc<sup>+</sup> CV. Electrolysis experiments lasting longer than 24 hrs required enhancements to maintain system stability and to increase turnover frequency. Of note, a salt bridge separated the Ag/Ag<sup>+</sup> reference electrode from the cathode compartment to avoid contamination from Ag<sup>+</sup>. A Luggin capillary was also used to reduce possible Ohmic drop between the working and reference electrodes.

### **Product Analysis**

The liquid products of electroreduction were analyzed by <sup>1</sup>H NMR spectrometry. The liquid phase was acidified with an aqueous solution of HCl (18%), spiked with a benzene internal standard and then diluted with CD<sub>3</sub>CN. Gaseous products of electroreduction were analyzed by gas chromatography using both a FID and a TCD. The headspace of the electrochemical cell was connected to the GC sample loop. A bubbler was then connected to the back end of the loop to confirm a gas-tight system. Gaseous products were analyzed at random points during electrolysis, at least thrice in a 24-hr period and after at least 1 hr from the start of experiment to ensure adequate degassing of connections.

### Selected Spectra of Product Analysis

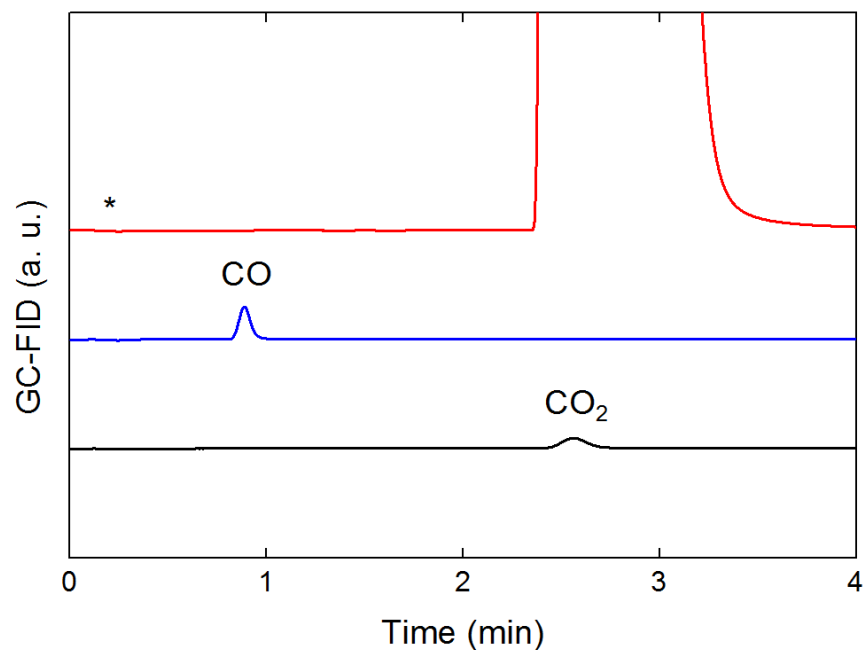

**Fig. S1** GC traces from FID channel *in situ* during bulk electrolysis with potential held at -1.73 V vs Fc/Fc<sup>+</sup> (red) juxtaposed with calibration standards (blue and black). All traces were taken at least 1 hr after the start of electrolysis. Asterisk (\*) indicates valve switching.

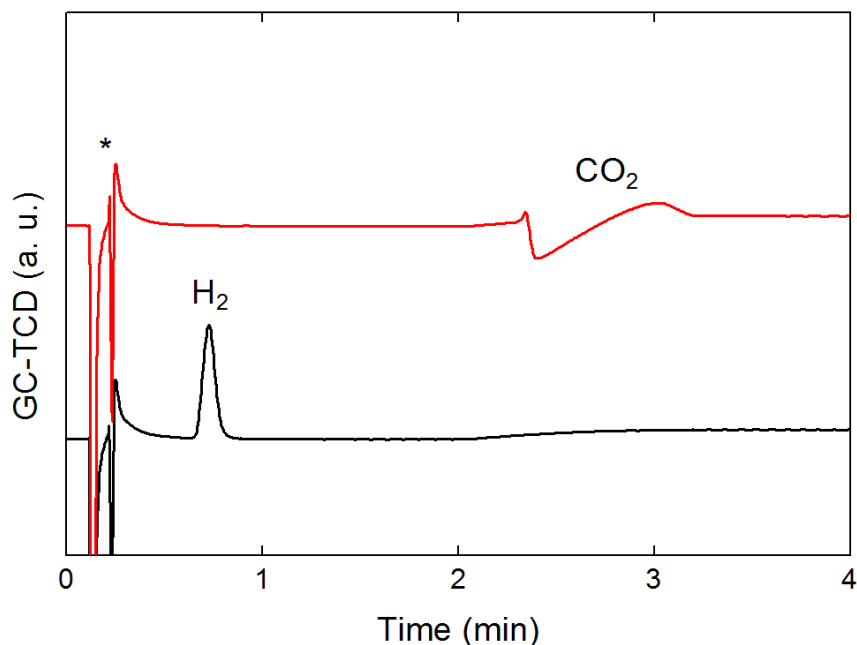

**Fig. S2** GC trace from TCD channel *in situ* during bulk electrolysis with potential held at  $-1.73\text{ V vs Fc/Fc}^+$  (red) juxtaposed with calibration standard (black). All traces were taken at least 1 hr after the start of electrolysis. Asterisk (\*) indicates valve switching.

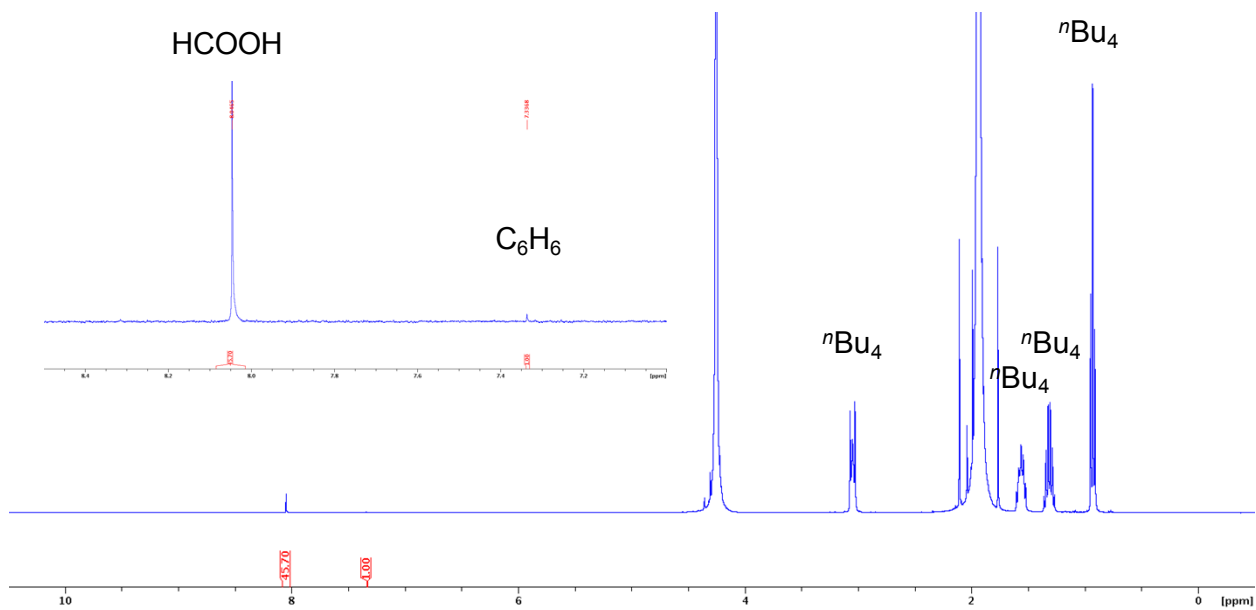

**Fig. S3**  $^1\text{H}$  NMR spectrum of formate electrolysis product following acidification (*vide supra*) and addition of a benzene internal standard in acetonitrile- $d_3$ . Spectrum taken post-electrolysis with potential held at  $-1.73\text{ V vs Fc/Fc}^+$ . Insert corresponds to a spectral region between 7.0 and 8.4 ppm.

### Selected Electrochemical Data

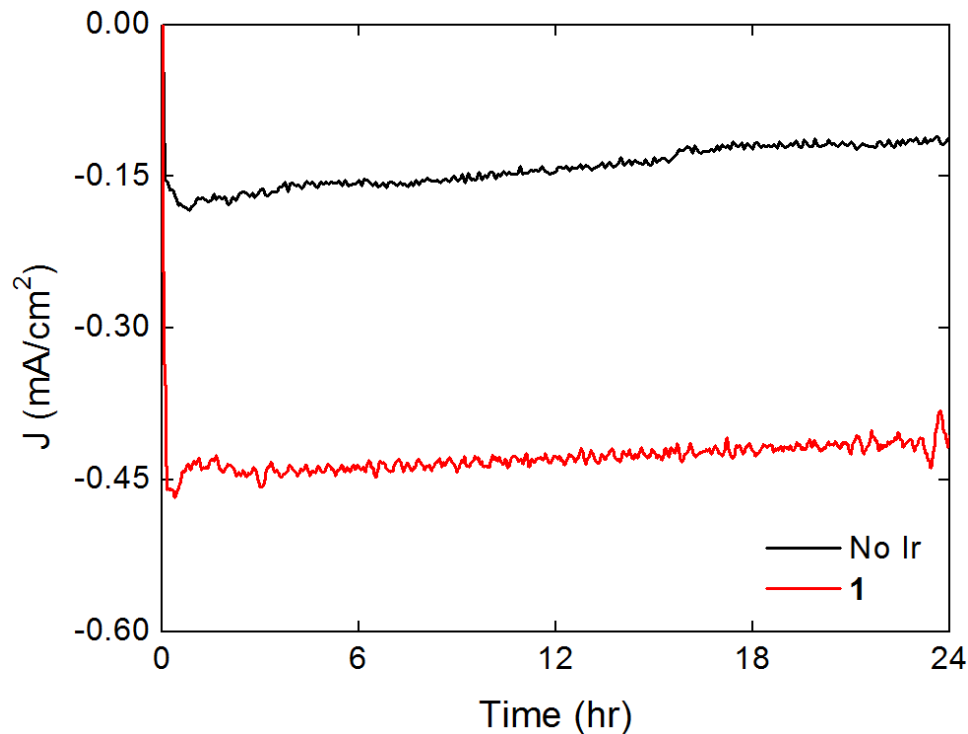

**Fig. S4** Electrolysis current in the absence of catalyst (black) and in the presence of 1 mM **1** (red) under CO<sub>2</sub> in 12% H<sub>2</sub>O/CH<sub>3</sub>CN with potential held at -1.73 V vs Fc/Fc<sup>+</sup> and vigorous stirring. Additional conditions: glassy carbon electrode, 0.1 M <sup>n</sup>Bu<sub>4</sub>NPF<sub>6</sub> electrolyte, 1 atm CO<sub>2</sub>, RT, no *iR* compensation.

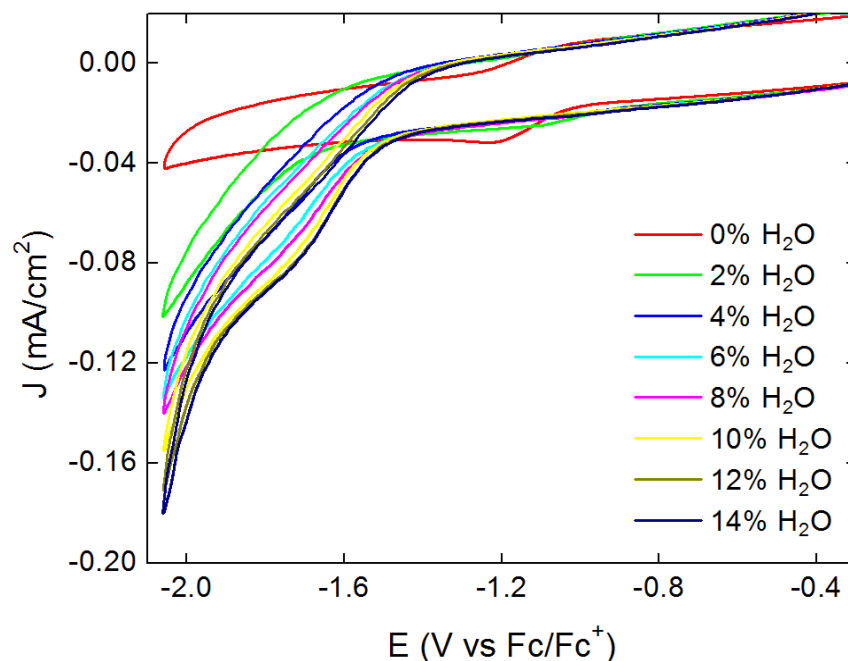

**Fig. S5** CVs of 1 mM **1** in CH<sub>3</sub>CN under CO<sub>2</sub> with 0-14% added H<sub>2</sub>O from +0.2 V to -1.4 V vs Fc/Fc<sup>+</sup>.



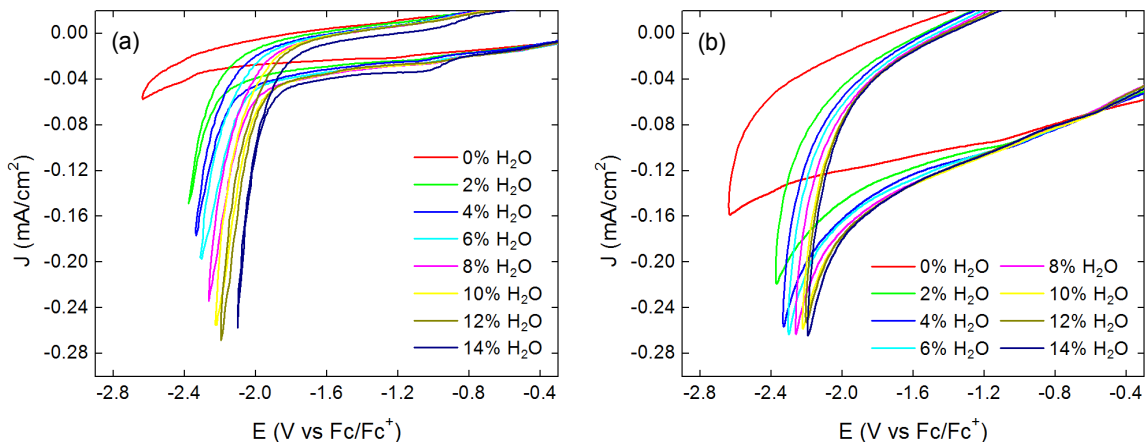

**Fig. S6** CVs of electrolyte solution (0.1 M  $n\text{Bu}_4\text{NPF}_6$ ) with 0-14% added  $\text{H}_2\text{O}$  under  $\text{N}_2$  at (a) 10 mV/s and (b) 100 mV/s scan rates.

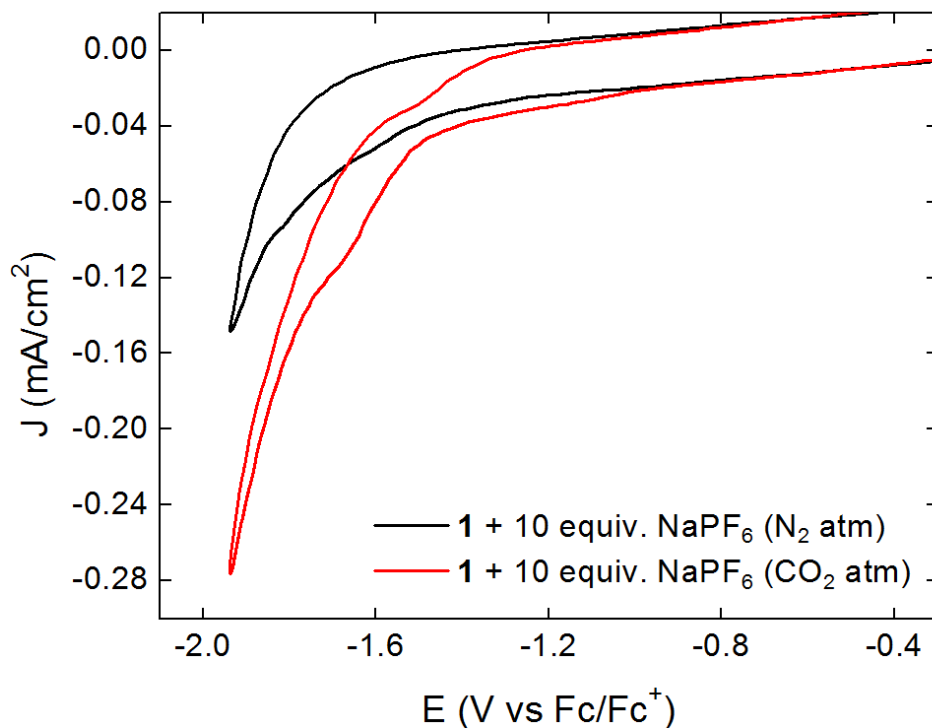

**Fig. S7.** CVs of 1 mM **1** and 10 mM (*i.e.*, 10 equiv.)  $\text{NaPF}_6$  under  $\text{N}_2$  (black) and 1 atm  $\text{CO}_2$  (red). Additional conditions: glassy carbon electrode (7.1 mm<sup>2</sup>), 12%  $\text{H}_2\text{O}/\text{CH}_3\text{CN}$  solvent, 0.1 M  $n\text{Bu}_4\text{NPF}_6$  electrolyte, 10 mV/s scan rate.

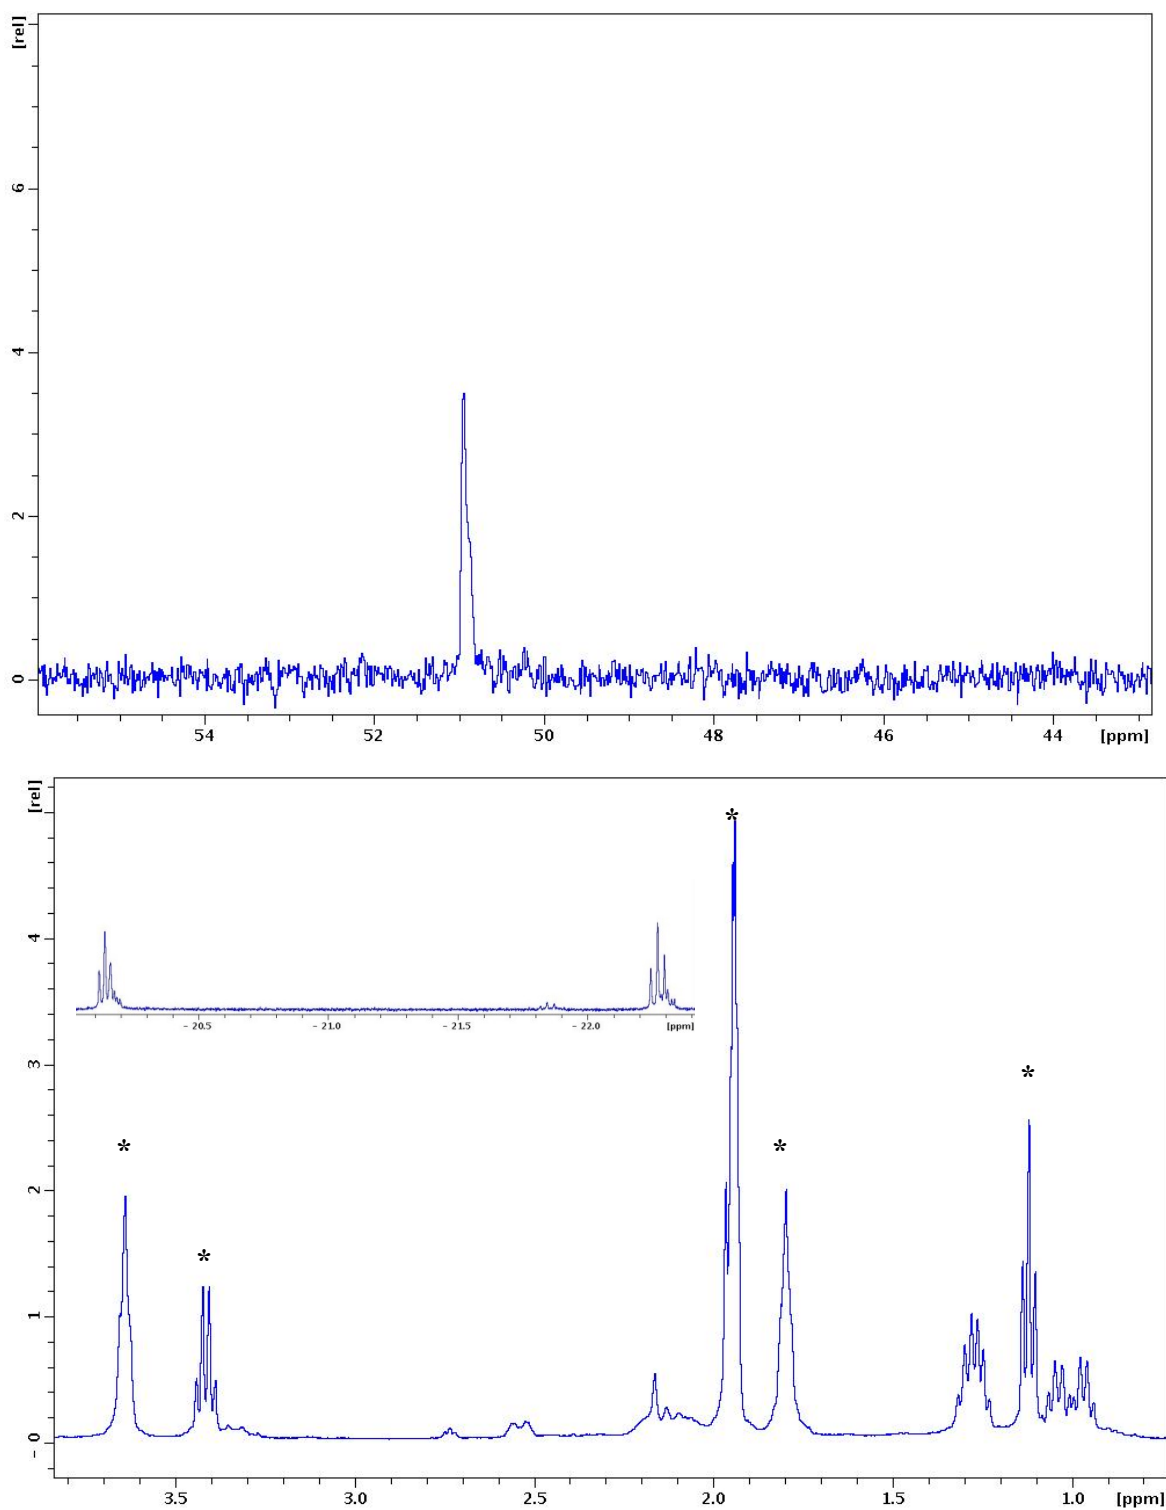

**Fig. S8**  $^{31}\text{P}\{^1\text{H}\}$  NMR (top) and  $^1\text{H}$  NMR (bottom) spectra of **3** generated from  $\text{H}[\text{B}(\text{Ar}^{\text{F}})_4]\cdot(\text{Et}_2\text{O})_2$  addition to **1** in acetonitrile- $d_3$ . An insert for the upfield region of the  $^1\text{H}$  NMR spectrum is provided. The \* denotes residual THF, diethyl ether, and acetonitrile solvents.

## References

- <sup>1</sup> A. B. Pangborn, M. A. Giardello, R. H. Grubbs, R. K. Rosen and F. J. Timmers, *Organometallics*, 1996, **15**, 1518-1520.
- <sup>2</sup> Z. E. Clarke, P. T. Maragh, T. P. Dasgupta, D. G. Gusev, A. J. Lough and K. Abdur-Rashid, *Organometallics*, 2006, **25**, 4113-4117
- <sup>3</sup> T. J. Schmeier, G. E. Dobereiner, R. H. Crabtree and N. Hazari, *J. Am. Chem. Soc.*, 2011, **133**, 9274-9277.
- <sup>4</sup> M. S. Brookhart, B. Grant, A. F. Volpe, Jr., *Organometallics* **1992**, *11*, 3920-3922.
